# Supplementary material for: Biosensor Based on Peroxidase-Mimetic Nanozyme and Lactate Oxidase for Accurate L-Lactate Analysis in Beverages
Source: MDPI journal article supplement (doi:10.3390/bios12111042), 2022-11-18
Supplement: s1 [file s1]

---

## Supplementary Materials

### **Biosensor Based on Peroxidase-Mimetic Nanozyme and Lactate Oxidase for Accurate L-Lactate Analysis in Beverages**

Oleh Smutok<sup>1\*</sup>, Taras Kavetsky<sup>2,3</sup>, Tetiana Prokopiv<sup>4</sup>, Roman Serkiz<sup>4</sup>, Ondrej Šauša<sup>5,6</sup>, Ivan Novák<sup>7</sup>, Helena Švajdlenková<sup>7</sup>, Igor Matko<sup>6</sup>, Mykhailo Gonchar<sup>2,4</sup>, Evgeny Katz<sup>1\*</sup>

<sup>1</sup> *Department of Chemistry and Biomolecular Science, Clarkson University, Potsdam, 13699-5810, New York, USA*

<sup>2</sup> *Department of Biology and Chemistry, Drohobych Ivan Franko State Pedagogical University, 82100 Drohobych, Ukraine*

<sup>3</sup> *Department of Materials Engineering, The John Paul II Catholic University of Lublin, 20-950 Lublin, Poland*

<sup>4</sup> *Institute of Cell Biology, National Academy of Sciences of Ukraine, 79005 Lviv, Ukraine*

<sup>5</sup> *Department of Nuclear Chemistry, Comenius University in Bratislava, 84215 Bratislava, Slovakia*

<sup>6</sup> *Institute of Physics, Slovak Academy of Sciences, 84511 Bratislava, Slovakia*

<sup>7</sup> *Polymer Institute, Slovak Academy of Sciences, 84541 Bratislava, Slovakia*

\*Corresponding author. E-mail address: osmutok@clarkson.edu (O. Smutok); ekatz@clarkson.edu (E. Katz)

---

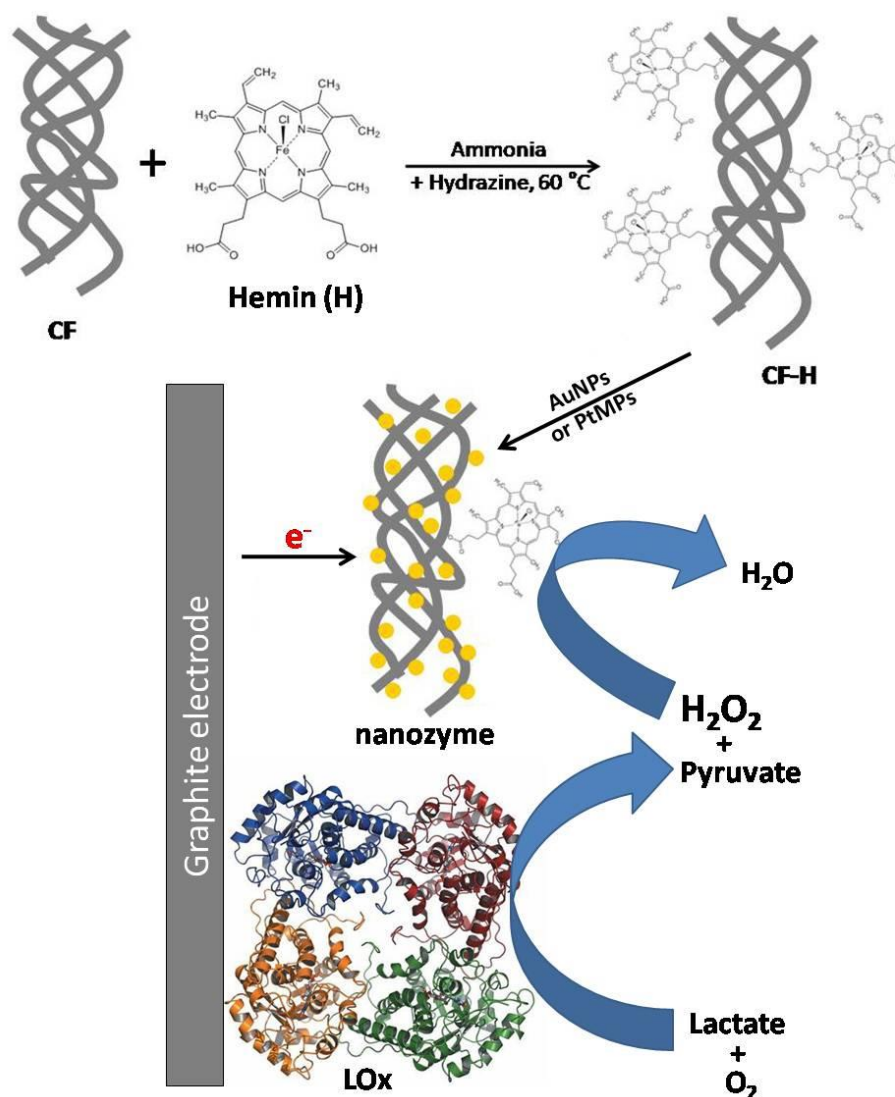

**Figure S1.** The schematic figure illustrates the research concept. Abbreviations: CF – carbon microfibers; H – hemin; CF-H – carbon microfibers modified by hemin; AuNPs – gold nanoparticles; PtMPs – platinum microparticles; LOx – lactate oxidase.

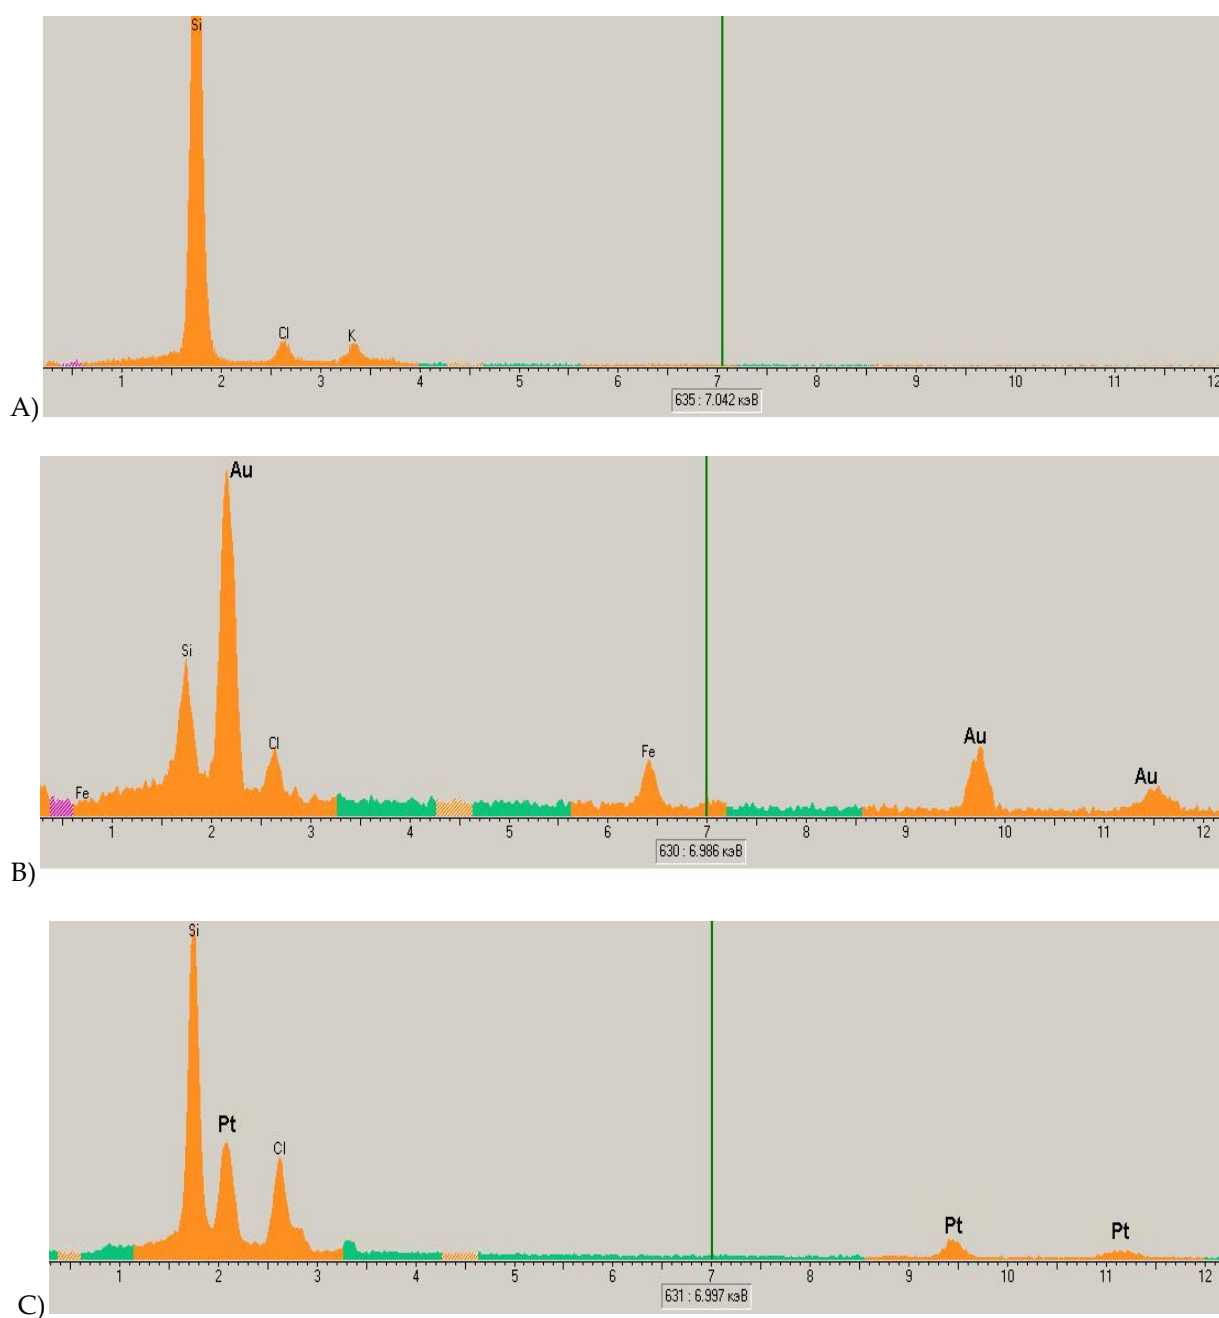

**Figure S2.** X-ray spectral analysis of non-modified debris of CF (A), CF-H-AuNPs (B), and CF-H-PtMPs (C).

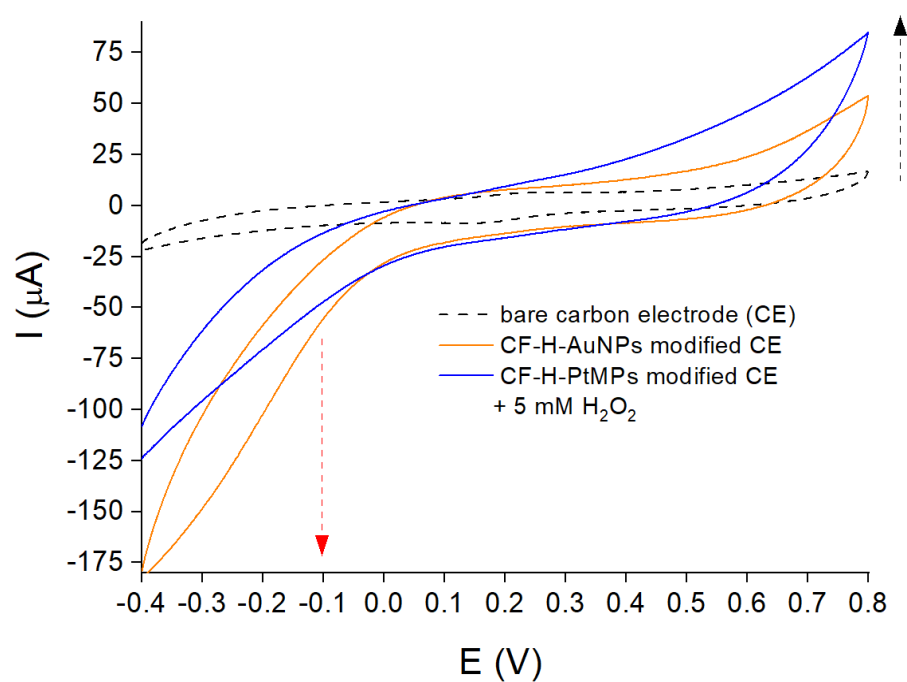

**Figure S3.** Cyclic voltamperograms of bare graphite electrode (dash line), CF-H-AuNPs-modified (orange line), and CF-H-PtMPs-modified (blue line) electrodes at addition of 5 mM  $\text{H}_2\text{O}_2$ . Conditions: scan rate  $50 \text{ mV}\cdot\text{s}^{-1}$  vs Ag/AgCl/KCl (3M) in 50 mM PB, pH 6.8 at room temperature.
